# Supplementary material
Source: publisher site journal article supplement (https://www.dovepress.com/article/454828)
Supplement: Supplementary file 1 [file get_supplementary_file.php]

## **Supplemental file 1** Information sheet for participants, Consent form and Questionnaires

## **Information sheet for participants**

**Title of the research**: Knowledge, Attitude and Associated Factors of Monkeypox Infection among Healthcare Workers in Injibara General Hospital, Northwest Ethiopia

**Principal investigator**: Zewdu Bishaw Aynalem

**Introduction:** You are invited to participate in a research study that aims to assess healthcare workers' (HCWs) knowledge and attitude towards Monkepox (mpox) and its associated factors.

**Purpose of the Study:** The purpose of this study is to assess the knowledge, attitude, and associated factors of mpox infection among HCWs working at Injibara General Hospital, Northwest Ethiopia.

**Procedures:** If you agree to participate in this study, you will be asked to complete a survey that includes questions about your demographics, knowledge and attitude about mpox infection

**Duration:** The question will take approximately 35 minutes to complete.

**Benefits of Participation:** There is no direct benefit to you now. However, by participating in this study, you will contribute to the body of knowledge about healthcare workers' knowledge and attitudes towards mpox infection. Your input may help to identify areas for improvement regarding mpox knowledge, attitude, and associated factors among HCWs.

**Risks:** Participating in this study will not have any risk or harm associated with data collection.

**Confidentiality:** Your responses will be kept confidential and anonymous. No identification will be recorded. We assure you that all information gathered will not be shared with anyone outside of the research team. The collected data will be stored securely and will only be used for research purposes.

**Voluntary Participation:** Your participation in this study is voluntary, and you have the right to withdraw at any time without any consequences. Your decision to participate or not will not affect your current or future careers in the healthcare facility. If you choose to withdraw, your data will not be included in the final analysis.

**Contact Information:** If you have any questions or concerns about the study, please contact Mr. Zewdu Bishaw using cell phone: +251918088395 or E-mail address: [zest7@yahoo.com](mailto:zest7@yahoo.com)

## **Consent form**

**Introduction:** We are seeking participation from healthcare workers at this hospital for a study titled “Knowledge, attitude and associated factors of monkeypox infection among healthcare workers in Injibara general hospital, Northwest Ethiopia”. This study aims to assess the knowledge, attitude, and associated factors of mpox infection among HCWs. We kindly ask for your cooperation in answering these questions. Participating in this study poses no risk to you other than taking a few minutes of your time. For further information, please refer to the following instructions.

**General instructions**

- Before filling out the questionnaires, make sure to review the study's purposes, procedures, the possible risks and benefits of participation, and the confidentiality details outlined in the information sheet above.
- The questionnaire has 3 parts containing 47 questions.
- You are not required to include your name on this questionnaire. Hence, there is no chance to know who filled in this questionnaire.
- All data collected will be maintained with strict confidentiality, utilizing code numbers for identification. Collected data will only be accessible to the authors.
- The completion of the questionnaire will require approximately 35 minutes of your time.
- You have the full right to ask for clarification on any unclear information regarding the study.
- You have the full right to skip or disregard any question or to stop participation at any point and nobody will impose you in this regard. However, providing honest and genuine answers to these questions is crucial in this field.

**Do you agree to participate in the study?**

Yes No

**Thank you in advance for your honest cooperation.**

**Participant code number ________**

1. **Questionnaires**

**Part I: Socio-demographic and other general characteristics related information**

**Instructions:**

- For blank spaces questions, write the answer on the space provided.
- For scale-typed questions, please circle your preferred answer

| **S.no** | **Question** | **Possible Answers** |
| --- | --- | --- |
|  | Age: | ______________ (years) |
|  | Sex: | 1. Male B. Female |
|  | Marital status: | A. Single B. Married C. Divorced D. Widowed |
|  | Education level: | A. Diploma B. Degree C. MSc and above |
|  | Profession type: | _____________________ |
|  | Work experience: | ________________ in years |
|  | Working unit (ward, department): | _____________________ |
|  | Your monthly salary: | ____________ Ethiopian Birr |
|  | Did you have a history of COVID-19 infection? | A. Yes B. No |
|  | Did you have a contact history with COVID-19-diagnosed people? | A. Yes B. No |
|  | Did you take COVID-19 vaccine? | A. Yes B. No |
|  | Do you have any known chronic illness? | A. Yes B. No |
|  | Have you access to information about monkeypox? | A. Yes B. No |
|  | If yes for **Q13**, what are your main sources of information? (more than one answer is possible) |  |
| Social media | A. Yes B. No |
| Television and radio | A. Yes B. No |
| Colleagues | A. Yes B. No |
| Medical books, or during studying | A. Yes B. No |

**Part II: Monkeypox Knowledge Questions**

**Instruction:** Here are 23 statements about Mpox infection, each with two possible answers. Please carefully read each statement and mark an "X" in front of the corresponding number.

| **No** | **Knowledge questions** | **Yes** | **No** |
| --- | --- | --- | --- |
|  | Monkeypox (mpox) is prevalent in Western and Central Africa |  |  |
|  | There is/are confirmed human monkeypox cases in Ethiopia |  |  |
|  | Monkeypox is a viral infection |  |  |
|  | Monkeypox is a bacterial infection |  |  |
|  | Monkeypox is easily transmitted from person to person |  |  |
|  | Monkeypox is transmitted by the bite of an infected animal |  |  |
|  | Monkeypox is transmitted through skin-to-skin contact |  |  |
|  | Monkeypox is transmitted through respiratory droplets |  |  |
|  | Monkeypox can be transmitted by eating insufficiently cooked meat from an infected animal |  |  |
|  | International travel is the main source of imported cases of monkeypox |  |  |
|  | Monkeypox and smallpox have almost similar signs and symptoms |  |  |
|  | Flu-like symptoms (fever, chills, cough, runny nose, fatigue, headache, muscle, and backache) are the early signs or symptoms of mpox |  |  |
|  | Rashes on the skin are one of the signs or symptoms of monkeypox |  |  |
|  | Vesicles on the skin are one of the signs or symptoms of human mpox |  |  |
|  | Diarrhea is one of the signs or symptoms of human monkeypox |  |  |
|  | Lymphadenopathy (swollen lymph nodes) is one clinical sign or symptom that could be used to differentiate between mpox and smallpox cases |  |  |
|  | Hand sanitizers and face masks are important in preventing mpox |  |  |
|  | One management option for symptomatic mpox patients is to use paracetamol |  |  |
|  | Antiviral drugs are required in the management of human mpox patients |  |  |
|  | Antibiotics required in the management of human mpox patients |  |  |
|  | People who got the smallpox vaccine are immunized against monkeypox |  |  |
|  | There is a specific vaccine for mpox |  |  |
|  | There is a specific treatment for mypox |  |  |

**Part III: Attitudes Questions about Monkeypox Infection**

**Instruction:** Below are statements about healthcare workers’ attitudes towards monkeypox infection, with each statement offering three alternatives on a three-point scale. Please carefully read and indicate your response by circling:

1= If you **disagree** with the statement.

2= If you **neither agree nor disagree** or **have no idea** about the statement.

3= If you **agree** with the statement

| **No** | **Mpox attitude measuring items** | **Scales** | | |
| --- | --- | --- | --- | --- |
|  | I am interested in learning more about monkeypox disease | 1 | 2 | 3 |
|  | I am interested in learning more about the epidemiology of new emerging diseases | 1 | 2 | 3 |
|  | I think that monkeypox disease can be transmitted to my country | 1 | 2 | 3 |
|  | I have bad feelings that monkeypox virus might become a worldwide pandemic | 1 | 2 | 3 |
|  | I think that monkeypox can add a new burden on the healthcare system of affected countries | 1 | 2 | 3 |
|  | I think traveling to monkeypox-disease-infected countries is risky and should be restricted | 1 | 2 | 3 |
|  | I have reservations/doubts about the virus's genesis as it is now explained | 1 | 2 | 3 |
|  | The spread of viruses is a deliberate attempt to reduce the size of the global population | 1 | 2 | 3 |
|  | I think monkeypox will finally be successfully controlled globally | 1 | 2 | 3 |
|  | I will receive the monkeypox vaccine if made available | 1 | 2 | 3 |
